# Supplementary material
Source: publisher figshare collection journal article supplement (https://sage.figshare.com/ndownloader/files/12944207)
Supplement: Supplementary file 1 [file 12944207]

### **Supplemental Material: Additional search information**

**Core concepts for search:** ("student" OR "school") AND ("nutrition" OR "food") AND ("policy" OR "guideline" OR "standard.")

**Example Search: EBSCO for Academic Search Premier:** ((TI (((elementary OR grade OR primary OR middle OR secondary OR high OR vocational) N3 (school\* OR student\* OR pupil\*)))) AND (TI (((policy\* OR policies OR service\* OR guideline\* OR standard\* OR "policy making") N3 (food\* OR nutrition\* OR diet\* OR eating OR lunch\* OR breakfast\* OR snack\* OR beverage\* OR fruit\* OR vegetable\*)))))) OR ((AB (((elementary OR grade OR primary OR middle OR secondary OR high OR vocational) N3 (school\* OR student\* OR pupil\*)))) AND (AB (((policy\* OR policies OR service\* OR guideline\* OR standard\* OR "policy making") N3 (food\* OR nutrition\* OR diet\* OR eating OR lunch\* OR breakfast\* OR snack\* OR beverage\* OR fruit\* OR vegetable\*))))))

**Hand search in prominent journals:** 1) Preventing Chronic Disease: Public Health Research, Practice and Policy 2) Public Health Nutrition 3) Canadian Journal of Dietetic Practice and Research and 4) Journal of School Health

### **Grey Literature Sources:**

|                                               |                                                                                                 |
|-----------------------------------------------|-------------------------------------------------------------------------------------------------|
| American School Health Association            | <a href="http://www.ashaweb.org/">http://www.ashaweb.org/</a>                                   |
| Australian Health Promotion Association       | <a href="http://www.healthpromotion.org.au/issues">http://www.healthpromotion.org.au/issues</a> |
| Bridging the Gap                              | <a href="https://www.bridgingthegap.org">https://www.bridgingthegap.org</a>                     |
| Canadian Public Health Association            | <a href="http://www.cpha.ca">http://www.cpha.ca</a>                                             |
| Centre for Disease Control and Protection     | <a href="http://www.cdc.gov/">http://www.cdc.gov/</a>                                           |
| Centre for Science in the Public Interest     | <a href="http://www.cspinet.org/">http://www.cspinet.org/</a>                                   |
| Health Promotion Forum of New Zealand         | <a href="http://www.hauora.co.nz/">http://www.hauora.co.nz/</a>                                 |
| Ontario Healthy Schools Association           | <a href="http://ontariohealthyschools.com/">http://ontariohealthyschools.com/</a>               |
| Pan-Canadian Joint Consortium for Health      | <a href="http://www.jcsh-cces.ca/">http://www.jcsh-cces.ca/</a>                                 |
| Public Health Association Australia           | <a href="https://www.phaa.net.au">https://www.phaa.net.au</a>                                   |
| Public Health Association of New Zealand inc. | <a href="http://www.pha.org.nz/keydocs.html">http://www.pha.org.nz/keydocs.html</a>             |
| Public Health Ontario                         | <a href="http://www.publichealthontario.ca/">http://www.publichealthontario.ca/</a>             |
| Robert Wood Johnson Foundation                | <a href="http://www.rwjf.org">http://www.rwjf.org</a>                                           |
| World Health Organization                     | <a href="http://www.who.int/en/">http://www.who.int/en/</a>                                     |
